# Supplementary material
Source: PubMed Central journal article supplement (PMC3543509)
Supplement: NIHMS427774-supplement-01.pdf [file NIHMS427774-supplement-01.pdf]

**Supplemental Table 1: Characteristics of ARIC participants according to Troponin T group at Visit 4, 1996-1998**

| Characteristic (mean or prevalence)                           | High sensitivity Troponin T Group (ng/L) <sup>a</sup> |             |             |             |             |
|---------------------------------------------------------------|-------------------------------------------------------|-------------|-------------|-------------|-------------|
|                                                               | <3                                                    | 3- ≤5       | 6-≤ 8       | 9- ≤13      | ≥14         |
| N                                                             | 3544                                                  | 2779        | 2269        | 1535        | 1066        |
| <b>Demographic</b>                                            |                                                       |             |             |             |             |
| Age, mean (SD), y                                             | 60.7 (5.1)                                            | 62.5 (5.5)  | 63.8 (5.5)  | 65.1 (5.6)  | 65.6(5.6)   |
| Male, %                                                       | 22.1                                                  | 39.4        | 54.4        | 65.4        | 76.4        |
| White, %                                                      | 78.2                                                  | 80.3        | 78.3        | 76.9        | 70.7        |
| Body mass index, mean (SD), kg/m <sup>2</sup>                 | 28.2 (5.6)                                            | 28.6 (5.5)  | 29.1 (5.6)  | 29.6 (5.6)  | 29.8 (5.7)  |
| <b>Medical history</b>                                        |                                                       |             |             |             |             |
| Current smoking, %                                            | 21.2                                                  | 13.2        | 10.7        | 10.6        | 12.8        |
| Former smoking, %                                             | 36.7                                                  | 42.3        | 46.9        | 50.8        | 53.2        |
| Current drinker, %                                            | 51.9                                                  | 51.8        | 48.7        | 45.0        | 41.4        |
| Hypertension, %                                               | 39.0                                                  | 43.4        | 50.3        | 57.8        | 68.3        |
| Systolic blood pressure, mean (SD), mmHg                      | 124.4 (17)                                            | 126.6 (18)  | 128.6 (19)  | 131.6 (20)  | 133.2 (22)  |
| Diastolic blood pressure, mean (SD), mmHg                     | 70.6 (10)                                             | 70.9 (10)   | 71.3 (10)   | 71.6 (11)   | 71.3 (12)   |
| Diabetes, (%)                                                 | 10.3                                                  | 12.3        | 17.3        | 22.9        | 40.2        |
| Physical activity (sport index), mean (SD) <sup>b</sup>       | 2.49 (0.8)                                            | 2.56 (0.8)  | 2.60 (0.8)  | 2.59 (0.8)  | 2.48 (0.8)  |
| Prudent diet in highest quintile, % <sup>b</sup>              | 20.3                                                  | 20.9        | 18.2        | 20.0        | 20.7        |
| Western diet in highest quintile, % <sup>b</sup>              | 16.9                                                  | 19.5        | 21.1        | 22.2        | 26.0        |
| <b>Laboratory data</b>                                        |                                                       |             |             |             |             |
| HDL-C, mean (SD), mg/dl <sup>c</sup>                          | 53.7 (0.4)                                            | 50.6 (0.4)  | 48.3 (0.4)  | 46.3 (0.4)  | 44.0 (0.4)  |
| Total cholesterol, mean (SD), mg/dl                           | 205.4 (0.9)                                           | 201.5 (0.9) | 198.8 (1.0) | 195.8 (1.0) | 192.3 (1.1) |
| Triglycerides, mean (SD), mg/dl                               | 140.7 (0.9)                                           | 140.7 (0.9) | 142.5 (1.0) | 148.7 (1.1) | 158.4 (1.4) |
| FEV1, mean (SD), litres/sec <sup>d</sup>                      | 2.78 (0.6)                                            | 2.94 (0.7)  | 3.08 (0.7)  | 3.16 (0.7)  | 3.25 (0.6)  |
| eGFR, mean (SD), ml/min <sup>e</sup>                          | 87.7 (14)                                             | 85.6 (14)   | 83.3 (15)   | 81.5 (16)   | 77.5 (19)   |
| <b>Medications</b>                                            |                                                       |             |             |             |             |
| Antihypertensives, %                                          | 34.5                                                  | 39.0        | 46.5        | 52.0        | 69.2        |
| Cholesterol lowering, %                                       | 12.3                                                  | 13.2        | 14.4        | 18.2        | 19.5        |
| Hormone therapy use in women, %                               | 33.7                                                  | 19.8        | 11.6        | 5.7         | 3.4         |
| <b>Biomarkers</b>                                             |                                                       |             |             |             |             |
| High sensitivity C reactive protein, mean, mg/L <sup>f</sup>  | 2.58                                                  | 2.31        | 2.26        | 2.30        | 3.00        |
| N terminal Pro B Natriuretic peptide mean, pg/ml <sup>f</sup> | 53.4                                                  | 57.9        | 63.0        | 78.3        | 154.4       |

<sup>a</sup>P values for differences in characteristics among Troponin groups were all < than 0.01 except for prudent diet in highest quintile- p value 0.12

<sup>b</sup> Physical activity, prudent and western diet at visit 3, <sup>c</sup> HDL-C indicates high- density lipoprotein cholesterol

<sup>d</sup> FEV1- indicates forced expiratory volume in 1 second at visit 2, <sup>e</sup> eGFR- indicates the estimated glomerular filtration rate, <sup>f</sup> Geometric means reported

SD- Standard deviation, N shown for each column is the maximum N. Numbers are lower for some variables due to missing data.

Système International (SI) conversion factor- HDL and total cholesterol (mmol/L): multiply by 0.0259, triglyceride (mmol/L): multiply by 0.0113

**Supplemental Table 2: Characteristics of ARIC participants according to B-type natriuretic peptide at Visit 4, 1996-1998**

| Characteristic (mean or prevalence)                          | N- terminal pro- B natriuretic peptide group (pg/ml) <sup>a</sup> |             |             |             |             |
|--------------------------------------------------------------|-------------------------------------------------------------------|-------------|-------------|-------------|-------------|
|                                                              | ≤ 27.4                                                            | 27.5-52.3   | 52.4-88.6   | 88.7-158.0  | ≥159        |
| N                                                            | 2240                                                              | 2244        | 2239        | 2233        | 2237        |
| <b>Demographic</b>                                           |                                                                   |             |             |             |             |
| Age, mean (SD), y                                            | 60.4 (5.0)                                                        | 61.9 (5.4)  | 62.9 (5.5)  | 63.6 (5.6)  | 65.3 (5.6)  |
| Male,%                                                       | 61.0                                                              | 48.2        | 38.9        | 34.0        | 38.2        |
| White,%                                                      | 63.6                                                              | 77.2        | 80.5        | 85.2        | 83.0        |
| Body mass index, mean (SD), kg/m <sup>2</sup>                | 29.8 (5.2)                                                        | 29.1 (5.6)  | 28.7 (5.5)  | 28.4 (5.8)  | 28.2 (5.8)  |
| <b>Medical history</b>                                       |                                                                   |             |             |             |             |
| Current smoking,%                                            | 14.0                                                              | 14.9        | 13.9        | 14.6        | 16.7        |
| Former smoking, %                                            | 45.9                                                              | 42.5        | 42.0        | 42.3        | 45.5        |
| Current drinker, %                                           | 48.2                                                              | 52.1        | 51.2        | 49.1        | 45.8        |
| Hypertension,%                                               | 40.4                                                              | 39.8        | 45.4        | 48.3        | 64.9        |
| Systolic blood pressure, mean (SD), mmHg                     | 123.3 (15)                                                        | 124.7 (17)  | 127.1 (19)  | 128.7 (19)  | 134.2 (22)  |
| Diastolic blood pressure, mean (SD), mmHg                    | 72.5 (9.4)                                                        | 71.3 (9.5)  | 70.5 (10)   | 70.3 (10)   | 70.5 (12)   |
| Diabetes,%                                                   | 20.3                                                              | 16.3        | 15.5        | 13.8        | 18.2        |
| Physical activity (sport index), mean (SD) <sup>b</sup>      | 2.56 (0.8)                                                        | 2.58 (0.8)  | 2.54 (0.8)  | 2.56 (0.8)  | 2.49 (0.8)  |
| Prudent diet in highest quintile, % <sup>b</sup>             | 17.4                                                              | 18.9        | 20.9        | 21.5        | 21.3        |
| Western diet in highest quintile,% <sup>b</sup>              | 25.0                                                              | 21.5        | 18.9        | 17.0        | 17.6        |
| <b>Laboratory data</b>                                       |                                                                   |             |             |             |             |
| HDL-C, mean (SD), mg/dl <sup>c</sup>                         | 46.3 (0.4)                                                        | 48.7 (0.4)  | 51.0 (0.4)  | 52.5 (0.5)  | 51.0 (0.5)  |
| Total cholesterol, mean (SD), mg/dl                          | 203.9 (1.0)                                                       | 202.7 (1.0) | 200.4 (0.9) | 200.4 (0.9) | 195.8 (1.0) |
| Triglycerides, mean (SD), md/dl                              | 151.3 (1.1)                                                       | 145.1 (1.0) | 140.7 (1.0) | 138.9 (0.9) | 142.5 (1.0) |
| FEV1, mean (SD), litres/sec <sup>d</sup>                     | 3.19 (0.7)                                                        | 3.05 (0.7)  | 2.92 (0.7)  | 2.86 (0.6)  | 2.86 (0.6)  |
| eGFR, mean (SD), ml/min <sup>e</sup>                         | 88.7 (14)                                                         | 86.4 (14)   | 84.6 (14)   | 83.4 (14)   | 79.4 (17)   |
| <b>Medications</b>                                           |                                                                   |             |             |             |             |
| Antihypertensives, %                                         | 38.6                                                              | 36.6        | 38.6        | 42.2        | 62.3        |
| Cholesterol lowering, %                                      | 12.7                                                              | 12.9        | 13.1        | 13.9        | 19.5        |
| Hormone therapy use in women, No. (%)                        | 10.1                                                              | 14.6        | 21.4        | 24.4        | 21.4        |
| <b>Biomarkers</b>                                            |                                                                   |             |             |             |             |
| High sensitivity Troponin T, mean, ng/L <sup>f</sup>         | 4.9                                                               | 5.0         | 5.3         | 5.3         | 7.5         |
| High sensitivity C reactive protein, mean, mg/L <sup>f</sup> | 2.20                                                              | 2.24        | 2.37        | 2.46        | 3.03        |

<sup>a</sup> P values for differences in characteristics among BNP group were all < than 0.03 except for former smoking- p value 0.77

<sup>b</sup> Physical activity, prudent and western diet at visit 3, <sup>c</sup> HDL-C indicates high- density lipoprotein cholesterol

<sup>d</sup> FEV1- indicates forced expiratory volume in 1 second at visit 2, <sup>e</sup> eGFR- indicates the estimated glomerular filtration rate, <sup>f</sup> Geometric means reported SD- Standard deviation ,N shown for each column is the maximum N. Numbers are lower for some variables due to missing data.

Système International (SI) conversion factor- HDL and total cholesterol (mmol/L): multiply by 0.0259, triglyceride (mmol/L): multiply by 0.0113

**Supplemental Table 3: Characteristics of ARIC participants according to C reactive protein group at Visit 4, 1996- 1998**

| Characteristic (mean or prevalence)                           | High sensitivity C- reactive protein group (mg/L) <sup>a</sup> |                 |                 |                 |             |
|---------------------------------------------------------------|----------------------------------------------------------------|-----------------|-----------------|-----------------|-------------|
|                                                               | ≤0.916mg/L                                                     | 0.917-1.761mg/L | 1.762-3.389mg/L | 3.390-6.578mg/L | ≥6.579mg/L  |
| N                                                             | 2238                                                           | 2239            | 2239            | 2239            | 2238        |
| <b>Demographic</b>                                            |                                                                |                 |                 |                 |             |
| Age, mean (SD), y                                             | 62.6 (5.8)                                                     | 63.0 (5.6)      | 63.0 (5.6)      | 63.0 (5.6)      | 62.7 (5.7)  |
| Male, %                                                       | 56.3                                                           | 52.3            | 48.4            | 34.8            | 28.4        |
| White, %                                                      | 83.0                                                           | 82.7            | 80.7            | 76.1            | 66.8        |
| Body mass index, mean (SD), kg/m <sup>2</sup>                 | 25.8 (4.0)                                                     | 27.7 (4.4)      | 28.7 (4.8)      | 30.1 (5.7)      | 31.7 (6.9)  |
| <b>Medical history</b>                                        |                                                                |                 |                 |                 |             |
| Current smoking, %                                            | 11.6                                                           | 12.3            | 15.7            | 16.6            | 18.0        |
| Former smoking, %                                             | 46.2                                                           | 45.3            | 44.6            | 41.4            | 40.7        |
| Current drinker, %                                            | 55.2                                                           | 53.8            | 51.6            | 46.5            | 39.2        |
| Hypertension,%                                                | 35.8                                                           | 43.7            | 45.8            | 52.0            | 61.5        |
| Systolic blood pressure, mean (SD), mmHg                      | 124.6 (19)                                                     | 126.5 (19)      | 127.4 (18)      | 129.0 (19)      | 130.6 (20)  |
| Diastolic blood pressure, mean (SD), mmHg                     | 71.0 (10)                                                      | 71.2 (10)       | 71.0 (10)       | 71.2 (10)       | 70.8 (11)   |
| Diabetes,%                                                    | 9.6                                                            | 12.7            | 15.6            | 20.5            | 25.5        |
| Physical activity (sport index), mean (SD) <sup>b</sup>       | 2.8 (0.9)                                                      | 2.6 (0.8)       | 2.6 (0.8)       | 2.5 (0.8)       | 2.4 (0.8)   |
| Prudent diet in highest quintile,% <sup>b</sup>               | 19.2                                                           | 20.5            | 19.3            | 19.9            | 21.2        |
| Western diet in highest quintile, % <sup>b</sup>              | 19.1                                                           | 19.8            | 21.0            | 19.2            | 20.8        |
| <b>Laboratory data</b>                                        |                                                                |                 |                 |                 |             |
| HDL-C, mean (SD), mg/dl <sup>c</sup>                          | 52.9 (0.5)                                                     | 49.8 (0.4)      | 48.3 (0.4)      | 48.7 (0.4)      | 49.8 (0.4)  |
| Total cholesterol, mean (SD), mg/dl                           | 195.6 (0.9)                                                    | 200.8 (0.9)     | 202.3 (1.0)     | 203.1 (1.0)     | 200.8 (1.0) |
| Triglycerides, mean (SD), mg/dl                               | 119.5 (0.8)                                                    | 138.9 (0.9)     | 149.6 (1.0)     | 156.6 (1.1)     | 154.0 (1.1) |
| FEV1, mean (SD), litres/sec <sup>d</sup>                      | 3.16 (0.7)                                                     | 3.09 (0.7)      | 3.02 (0.7)      | 2.85 (0.6)      | 2.75 (0.6)  |
| eGFR, mean (SD), ml/min <sup>e</sup>                          | 84.9 (14)                                                      | 84.2 (14)       | 84.5 (15)       | 84.3 (16)       | 85.2 (17)   |
| <b>Medications</b>                                            |                                                                |                 |                 |                 |             |
| Antihypertensives, %                                          | 32.3                                                           | 39.1            | 40.8            | 49.0            | 57.5        |
| Cholesterol lowering, %                                       | 14.5                                                           | 15.3            | 16.0            | 13.7            | 12.6        |
| Hormone therapy use in women, (%)                             | 9.8                                                            | 11.8            | 15.4            | 24.9            | 30.7        |
| <b>Biomarkers</b>                                             |                                                                |                 |                 |                 |             |
| High sensitivity Troponin T, mean, ng/L <sup>f</sup>          | 5.5                                                            | 5.5             | 5.4             | 5.4             | 5.7         |
| N terminal Pro B Natriuretic peptide mean, pg/ml <sup>f</sup> | 57.7                                                           | 59.2            | 62.8            | 68.4            | 83.0        |

<sup>a</sup> P values for differences in characteristics among CRP groups were all < than 0.03 except for age, diastolic blood pressure, eGFR, western diet, prudent diet, and Troponin T with p >0.06

<sup>b</sup> Physical activity, prudent and western diet at visit 3, <sup>c</sup> HDL-C indicates high- density lipoprotein cholesterol

<sup>d</sup> FEV1- indicates forced expiratory volume in 1 second at visit 2, <sup>e</sup> eGFR- indicates the estimated glomerular filtration rate, <sup>f</sup> Geometric means reported

SD- Standard deviation, N shown for each column is the maximum N. Numbers are lower for some variables due to missing data.

Système International (SI) conversion factor- HDL and total cholesterol (mmol/L): multiply by 0.0259, triglyceride (mmol/L): multiply by 0.0113

**Supplemental Table 4: Hazard Ratios for Associations between Troponin T and mortality, ARIC, 1996-2008**

|                                       | Hazard ratio (95% Confidence Interval) |                   | <i>P</i> for trend |
|---------------------------------------|----------------------------------------|-------------------|--------------------|
|                                       | <14ng/L                                | ≥14ng/L           |                    |
| N                                     | 10127                                  | 1066              |                    |
| Total mortality (n=1909)              |                                        |                   |                    |
| Events                                | 1408                                   | 501               |                    |
| Model 1                               | 1                                      | 3.01 (2.68- 3.38) | <0.0001            |
| Model 2                               | 1                                      | 2.22 (1.91- 2.59) | <0.0001            |
| Model 3                               | 1                                      | 1.94 (1.66- 2.26) | <0.0001            |
| All CVD mortality (n=358 )            |                                        |                   |                    |
| Events                                | 255                                    | 103               |                    |
| Model 1                               | 1                                      | 4.39 (3.42- 5.62) | <0.0001            |
| Model 2                               | 1                                      | 3.72 (2.79- 4.97) | <0.0001            |
| Model 3                               | 1                                      | 2.81 (2.08- 3.80) | <0.0001            |
| CHD mortality (n= 138)                |                                        |                   |                    |
| Events                                | 101                                    | 37                |                    |
| Model 1                               | 1                                      | 3.61 (2.41- 5.40) | <0.0001            |
| Model 2                               | 1                                      | 3.26 (2.06- 5.17) | <0.0001            |
| Model 3                               | 1                                      | 2.61 (1.62- 4.22) | <0.0001            |
| Stroke mortality (n= 67)              |                                        |                   |                    |
| Events                                | 51                                     | 16                |                    |
| Model 1                               | 1                                      | 4.11 (2.25- 7.52) | <0.0001            |
| Model 2                               | 1                                      | 3.18 (1.51- 6.69) | 0.002              |
| Model 3                               | 1                                      | 2.48 (1.15- 5.36) | 0.02               |
| Cancer Mortality (n= 502)             |                                        |                   |                    |
| Events                                | 432                                    | 70                |                    |
| Model 1                               | 1                                      | 1.38 (1.04- 1.83) | 0.03               |
| Model 2                               | 1                                      | 1.52 (1.10- 2.10) | 0.01               |
| Model 3                               | 1                                      | 1.47 (1.06- 2.03) | 0.02               |
| Respiratory disease mortality (n= 99) |                                        |                   |                    |
| Events                                | 76                                     | 23                |                    |
| Model 1                               | 1                                      | 2.56 (1.54- 4.29) | 0.0003             |
| Model 2                               | 1                                      | 2.00 (1.01- 3.97) | 0.05               |
| Model 3                               | 1                                      | 1.99 (0.99- 4.02) | 0.05               |

CHD- indicates coronary heart disease, CVD- indicates cardiovascular disease, *P* for linear trend across categories

Model 1- adjusted for age, sex and race

Model 2- adjusted for model 1+ body mass index, total cholesterol, high density lipoprotein cholesterol, diet, sport index, smoking status, drinking status, hormone use, systolic blood pressure, antihypertensive medication, diabetes, forced expiratory volume in 1 second/forced vital capacity predicted %, estimated glomerular filtration rate. In addition, total mortality was adjusted for history of cancer, CVD, stroke, heart failure and respiratory disease

Model 3- adjusted for model 2 + high sensitivity C- reactive protein (Hs-CRP) and N terminal pro B natriuretic peptide (NT-proBNP)

**Supplemental Table 5: Hazard Ratios for Associations between B natriuretic peptide and mortality, ARIC, 1996-2008**

|                                       | Hazard ratio (95% Confidence Interval) |                   | P for trend |
|---------------------------------------|----------------------------------------|-------------------|-------------|
|                                       | >125pg/ml                              | ≤125pg/ml         |             |
| N                                     | 8162                                   | 3031              |             |
| Total mortality (n=1909)              |                                        |                   |             |
| Events                                | 1016                                   | 893               |             |
| Model 1                               | 1                                      | 2.28 (2.07- 2.52) | <0.0001     |
| Model 2                               | 1                                      | 1.81 (1.59- 2.05) | <0.0001     |
| Model 3                               | 1                                      | 1.57 (1.38- 1.79) | <0.0001     |
| All CVD mortality (n= 358)            |                                        |                   |             |
| Events                                | 189                                    | 169               |             |
| Model 1                               | 1                                      | 3.12 (2.51- 3.88) | <0.0001     |
| Model 2                               | 1                                      | 2.90 (2.24- 3.75) | <0.0001     |
| Model 3                               | 1                                      | 2.27 (1.74- 2.95) | <0.0001     |
| CHD mortality (n= 138)                |                                        |                   |             |
| Events                                | 79                                     | 59                |             |
| Model 1                               | 1                                      | 2.55 (1.79- 3.64) | <0.0001     |
| Model 2                               | 1                                      | 2.33 (1.55- 3.51) | <0.0001     |
| Model 3                               | 1                                      | 1.83 (1.20- 2.79) | 0.01        |
| Stroke mortality (n= 67)              |                                        |                   |             |
| Events                                | 33                                     | 34                |             |
| Model 1                               | 1                                      | 3.04 (1.84- 5.05) | <0.0001     |
| Model 2                               | 1                                      | 2.21 (1.21- 4.05) | 0.01        |
| Model 3                               | 1                                      | 1.81 (0.97- 3.38) | 0.06        |
| Cancer Mortality (n= 502)             |                                        |                   |             |
| Events                                | 343                                    | 159               |             |
| Model 1                               | 1                                      | 1.25 (1.02- 1.53) | 0.04        |
| Model 2                               | 1                                      | 1.27 (1.00- 1.61) | 0.06        |
| Model 3                               | 1                                      | 1.21 (0.95- 1.55) | 0.13        |
| Respiratory disease mortality (n= 99) |                                        |                   |             |
| Events                                | 61                                     | 38                |             |
| Model 1                               | 1                                      | 1.42 (0.91- 2.21) | 0.12        |
| Model 2                               | 1                                      | 0.83 (0.46- 1.52) | 0.56        |
| Model 3                               | 1                                      | 0.67 (0.37- 1.23) | 0.20        |

CHD- indicates coronary heart disease, CVD- indicates cardiovascular disease, *P* for linear trend across quintiles

Model 1- adjusted for age, sex and race

Model 2- adjusted for model 1+ body mass index, total cholesterol, high density lipoprotein cholesterol, diet, sport index, smoking status, drinking status, hormone use, systolic blood pressure, antihypertensive medication, diabetes, forced expiratory volume in 1 second/forced vital capacity predicted %, estimated glomerular filtration rate. In addition, total mortality was adjusted for history of cancer, CVD, stroke, heart failure and respiratory disease

Model 3- adjusted for model 2 + high sensitivity C- reactive protein (Hs-CRP) and high sensitivity troponin T

**Supplemental Table 6: Hazard Ratios for Associations with C reactive protein and mortality, ARIC, 1996-2008**

|                                       | Hazard ratio (95% Confidence Interval) |                   | P for trend |
|---------------------------------------|----------------------------------------|-------------------|-------------|
|                                       | ≤3mg/L                                 | >3mg/L            |             |
| N                                     | 6305                                   | 4888              |             |
| Total mortality (n=1909)              |                                        |                   |             |
| Events                                | 902                                    | 1007              |             |
| Model 1                               | 1                                      | 1.68 (1.52 -1.85) | <0.0001     |
| Model 2                               | 1                                      | 1.39 (1.23 -1.58) | <0.0001     |
| Model 3                               | 1                                      | 1.31 (1.15- 1.48) | <0.0001     |
| All CVD mortality (n= 358)            |                                        |                   |             |
| Events                                | 171                                    | 187               |             |
| Model 1                               | 1                                      | 1.66 (1.34- 2.05) | <0.0001     |
| Model 2                               | 1                                      | 1.45 (1.12 -1.87) | 0.01        |
| Model 3                               | 1                                      | 1.27 (0.98- 1.65) | 0.07        |
| CHD mortality (n= 138)                |                                        |                   |             |
| Events                                | 63                                     | 75                |             |
| Model 1                               | 1                                      | 1.93 (1.37- 2.72) | 0.0002      |
| Model 2                               | 1                                      | 1.56 (1.04- 2.35) | 0.03        |
| Model 3                               | 1                                      | 1.40 (0.92- 2.11) | 0.12        |
| Stroke mortality (n= 67)              |                                        |                   |             |
| Events                                | 37                                     | 30                |             |
| Model 1                               | 1                                      | 1.21 (0.74 -1.98) | 0.45        |
| Model 2                               | 1                                      | 1.42 (0.77- 2.63) | 0.26        |
| Model 3                               | 1                                      | 1.31 (0.70- 2.43) | 0.40        |
| Cancer Mortality (n= 502)             |                                        |                   |             |
| Events                                | 269                                    | 233               |             |
| Model 1                               | 1                                      | 1.34 (1.12 -1.62) | 0.002       |
| Model 2                               | 1                                      | 1.15 (0.92- 1.43) | 0.24        |
| Model 3                               | 1                                      | 1.12 (0.90- 1.41) | 0.31        |
| Respiratory disease mortality (n= 99) |                                        |                   |             |
| Events                                | 38                                     | 61                |             |
| Model 1                               | 1                                      | 2.91 (1.90 -4.47) | <0.0001     |
| Model 2                               | 1                                      | 2.53 (1.44- 4.45) | 0.001       |
| Model 3                               | 1                                      | 2.47 (1.39- 4.39) | 0.02        |

CHD- indicates coronary heart disease, CVD- indicates cardiovascular disease, P for linear trend across quintiles

Model 1- adjusted for age, sex and race

Model 2- adjusted for model 1+ body mass index, total cholesterol, high density lipoprotein cholesterol, diet, sport index, smoking status, drinking status, hormone use, systolic blood pressure, antihypertensive medication, diabetes, forced expiratory volume in 1 second/forced vital capacity predicted %, estimated glomerular filtration rate. In addition, total mortality was adjusted for history of cancer, CVD, stroke, heart failure and respiratory disease

Model 3- adjusted for model 2 + N terminal pro B natriuretic peptide (NT-proBNP) and high sensitivity troponin T
